# Supplementary material
Source: PubMed Central journal article supplement (PMC6058791)
Supplement: 2018_193847-Disclosures_and_Contributions.pdf [file 2018_193847-Disclosures_and_Contributions.pdf]

Haematologica  
HAEMATOL/2018/193847  
Version 1

NSG-S mice for acute myeloid leukemia, yes. For myelodysplastic  
syndrome, no.

Emmanuel Griessinger and Michael Andreeff

Disclosures: None

Contributions: EG wrote the editorial that was reviewed and corrected by MA
